1 **Circulating anti-Müllerian hormone levels in pre-menopausal women: novel genetic**  
2 **insights from a GWAS meta-analysis**

3 Natàlia Pujol-Gualdo#(1,2), Minna K. Karjalainen (3,4), Urmo Vösa (1), Riikka K. Arffman (2),  
4 Reedik Mägi (1), Justiina Ronkainen(3), Triin Laisk\*(1), Terhi T. Piltonen\*(2)

5 #first and corresponding author / \*co-last authorship

6 1. Estonian Genome Centre, Institute of Genomics, University of Tartu, Tartu, Estonia

7 2. Department of Obstetrics and Gynecology, Research Unit of Clinical Medicine, University  
8 of Oulu, Oulu, Finland

9 3. Research Unit of Population Health, Faculty of Medicine, University of Oulu, Oulu, Finland

10 4. Northern Finland Birth Cohorts, Arctic Biobank, Infrastructure for Population Studies,  
11 Faculty of Medicine, University of Oulu, Oulu, Finland

12 **Abstract**

13 **Study question:** Can a genome-wide association study (GWAS) meta-analysis, including a  
14 large sample of young premenopausal women from a founder population from Northern  
15 Finland, identify novel genetic variants for circulating anti-Müllerian hormone (AMH) levels  
16 and provide insights into biological pathways and tissues involved in AMH regulation?

17 **Summary answer:** We identified six loci associated with AMH levels at  $P < 5 \times 10^{-8}$ ,  
18 including the previously reported *MCM8*, *AMH* and *TEX41* loci, and three novel signals in or  
19 near *CHEK2*, *BMP4* and *EIF4EBP1*. Gene set enrichment analysis highlighted significant  
20 enrichment in renal system vasculature morphogenesis and tissue enrichment analysis  
21 ranks the pituitary gland as a top associated tissue.

22 **What is known already:** AMH is expressed by preantral and small antral stage ovarian  
23 follicles in women, and variation in age-specific circulating AMH levels has been associated  
24 with several health conditions. However, the biological mechanisms underlying the  
25 association between health conditions and AMH levels are not yet fully understood. Previous  
26 GWAS have identified loci associated with AMH levels in pre-menopausal women, but they  
27 were limited by small sample sizes or focused mostly on older pre-menopausal women.

28 **Study design, size, duration:** We performed a GWAS meta-analysis for AMH level  
29 measurements in 9,668 pre-menopausal women.

30 **Participants/materials, setting, methods:** We performed a GWAS meta-analysis in which  
31 we combined 2,619 AMH measurements (at age 31 years old) from a prospective founder  
32 population cohort (Northern Finland Birth Cohort 1966, NFBC1966) with a previous GWAS  
33 meta-analysis that included 7,049 pre-menopausal women (spanning age range 15-48).  
34 NFBC1966 AMH measurements were quantified using an automated assay (Elecsys® AMH  
35 Plus (Roche)). We annotated the genetic variants, combined different data layers to prioritise  
36 potential candidate genes, described significant pathways and tissues enriched by the

37 GWAS signals, identified plausible regulatory roles using colocalization analysis and  
38 leveraged publicly available summary statistics to assess genetic and phenotypic  
39 correlations with multiple traits.

40 **Main results and the role of chance:** Three novel genome-wide significant loci were  
41 identified. One of these is in complete linkage disequilibrium with c.1100delC in *CHEK2*,  
42 which is found to be 4-fold enriched in the Finnish population compared to other European  
43 populations. We propose a plausible regulatory effect of some of the GWAS variants linked  
44 to AMH, as they colocalise with GWAS signals associated with gene expression levels of  
45 *BMP4*, *TEX41* and *EIFBP41*. Gene set analysis highlighted significant enrichment in renal  
46 system vasculature morphogenesis and tissue enrichment analysis ranked the pituitary  
47 gland as the top association.

48 **Large scale data:** The GWAS meta-analysis summary statistics will be available for  
49 download from the GWAS Catalog. Accession numbers will be provided upon publication.

50 **Limitations, reasons for caution:** This study only included women of European ancestry  
51 and the unavailability of sufficiently sized relevant tissue data in gene expression datasets  
52 hinders the assessment of potential regulatory effects in reproductive tissues.

53 **Wider implications of the findings:** Our results highlight the increased power of founder  
54 populations and larger sample sizes to boost the discovery of novel trait-associated variants  
55 underlying variation in AMH levels, which aided to characterise novel biological pathways  
56 and plausible genetic regulatory effects linked with AMH levels variation for the first time.

57 **Study funding / competing interest(s):** This work has received funding from the European  
58 Union's Horizon 2020 research and innovation programme under the MATER Marie  
59 Sklodowska-Curie grant agreement No. 813707 and Oulu university scholarship foundation  
60 (N.P.-G.), Academy of Finland, Sigrid Jusélius Foundation, Novo Nordisk, University of Oulu,  
61 Roche Diagnostics (T.T.P). This work was supported by the Estonian Research Council  
62 grant 1911 (R.M.). J.R. was supported by the European Union's Horizon 2020 research and  
63 innovation program under grant agreements No. 874739 (LongITools), 824989 (EUCAN-  
64 Connect), 848158 (EarlyCause) and 733206 (LifeCycle). U.V. was supported by the  
65 Estonian Research Council grant PRG (PRG1291). The NFBC1966 received financial  
66 support from University of Oulu Grant no. 24000692, Oulu University Hospital Grant no.  
67 24301140, ERDF European Regional Development Fund Grant no. 539/2010 A31592.

68 **Keywords:** AMH; anti-Mullerian hormone, genome-wide association study, low-frequency  
69 variants, reproductive ageing

## 70 INTRODUCTION

71 Anti-Müllerian hormone (AMH) is a member of the transforming growth factor  $\beta$  (TGF- $\beta$ )  
72 superfamily, which includes the bone morphogenic proteins (BMPs), growth differentiation  
73 factors, activins and inhibins. Despite owing its name to its classical role in male sexual  
74 differentiation, AMH is also expressed by the ovarian granulosa cells during the primary to  
75 small antral stage of follicle development (Weenen *et al.*, 2004). In adult women, serum  
76 AMH levels decrease with age, with undetectable levels following menopause, signalling  
77 depletion of ovarian reserve (Finkelstei *et al.*, 2020). As a result, AMH is primarily known as

78 a serum marker for ovarian reserve. Previous studies have indicated that variations in age-  
79 specific circulating AMH levels are linked with several health conditions, including breast  
80 cancer (Ge *et al.*, 2018) and polycystic ovary syndrome (PCOS) (Homburg and Crawford,  
81 2014). Therefore, identifying genetic determinants of inter-individual variation in AMH  
82 measurements may offer valuable insight into their biological mechanistic effects and impact  
83 in health and disease beyond reproductive ageing.

84 Three previous genome-wide association studies have identified a few loci associated with  
85 AMH levels in pre-menopausal women (Schuh-Huerta *et al.*, 2012; Ruth *et al.*, 2019;  
86 Verdiesen *et al.*, 2022). However, these studies were limited by small sample size (Schuh-  
87 Huerta *et al.*, 2012) or focusing only or mostly on older pre-menopausal women (Ruth *et al.*,  
88 2019; Verdiesen *et al.*, 2022). Since AMH decreases with age also the AMH variability  
89 decreases in older ages, and therefore there is less power to detect associations in older  
90 pre-menopausal women compared to younger pre-menopausal women. To address these  
91 limitations, our current work analyses data from a single time point measured in relatively  
92 young pre-menopausal women and combines this dataset with a previous meta-analysis  
93 (Verdiesen *et al.*, 2022), to identify and characterise additional loci associated with AMH  
94 levels in pre-menopausal women.

95 The studies conducted so far have focused on European ancestry, mainly powered to  
96 discover associations with common genetic variants. Nonetheless, founder populations such  
97 as those found in northern Finland, represent a powerful resource to accelerate discovery of  
98 new biological mechanisms driven by low-frequency alleles that have risen to higher  
99 frequency due to unique demographic history (Kurki *et al.*, 2023).

100 In the present study, we added 2,619 AMH measurements (at age 31 years old) from a  
101 prospective founder population cohort (Northern Finland Birth Cohort 1966, NFBC1966) to a  
102 previous GWAS meta-analysis of 7,049 pre-menopausal women (spanning age range 15-  
103 48) (Verdiesen *et al.*, 2022), reaching the largest sample size for assessing AMH variation in  
104 women from reproductive age to date (N=9,668). Beyond detecting three out of the four  
105 previously identified signals near *TEX41*, *MCM8* and *AMH*, we identified three novel signals  
106 near *EIF4EBP1*, *BMP4*, and *CHEK2*. In the *CHEK2* locus, the c.1100delC variant is enriched  
107 in the Finnish population and in complete linkage disequilibrium ( $r^2=1$ ) with the lead variant  
108 identified in that locus. Additionally, we tested regulatory effects of GWAS variants on  
109 specific genes and gene transcript expression in multiple tissues using colocalization  
110 analysis, evaluated gene set and tissue set enrichments, and estimated genetic correlations  
111 and phenotypic associations across multiple phenotypes, by leveraging publicly available  
112 summary statistics.

## 113 **METHODS**

### 114 **Study design and setting**

115  
116 This study is based on the prospective population-based NFBC1966 study (University of  
117 Oulu, 1966, <http://urn.fi/urn:nbn:fi:att:bc1e5408-980e-4a62-b899-43bec3755243>). During  
118 1966, 12231 children (of them 5,889 females) were born in the two northernmost provinces  
119 of Finland (covering 48% of Finnish territory). Originally, the study was set to evaluate early  
120 life factors on long-term health and work ability. The cohort population has been followed up  
121 at four different time points: 1, 14, 31 and 46 years of age (set by the cohort centre).  
122 Comprehensive questionnaires on female health and clinical examinations with biological  
123 data collection were performed at ages 31 and 46 years.

124

125 The detailed cohort description and follow up protocol has been previously published  
126 (Nordström *et al.*, 2022). Briefly, in 1997 (the 31-year follow-up) women living in the Northern  
127 Finland area or in the Helsinki metropolitan area (n=4074 women) were invited to a clinical  
128 examination, in which 3,127 (77%) women participated. The present study includes 2,619  
129 women with AMH and genetic data available at 31 years old (median=31.1, interquartile  
130 range (IQR)=30.9-31.4).

131  
132 For the meta-analysis, publicly available summary statistics from an independent second  
133 study evaluating AMH variations across 7,049 pre-menopausal women were used  
134 (Verdiesen *et al.*, 2022). Publicly available summary statistics were downloaded from the  
135 GWAS catalog (<https://www.ebi.ac.uk/gwas/publications/35274129>) under accession  
136 number GCST90104596. This study included data from the AMH GWAS meta-analysis by  
137 Ruth *et al.* (n=3,334) (Ruth *et al.*, 2019), which meta-analysed four studies, and three  
138 cohorts which were additionally analysed and joined to the latter, conforming the most recent  
139 meta-analysis (n=7,049) (Verdiesen *et al.*, 2022). The cohort details from the current meta-  
140 analysis (n=9,668) can be found in Supplementary Table 1. More details of cohort  
141 description of the studies included can be found in (Verdiesen *et al.*, 2022). All studies had  
142 received ethical approval from institutional ethics committees.

143

144

#### 145 **AMH measurement in NFBC1966**

146 Serum samples were drawn in 1997 (the 31-year follow up), sealed and stored at -20°C  
147 since then. Serum AMH concentrations were measured using the automated Elecsys®  
148 electrochemiluminescence immunoassay on a Cobas E411 analyser according to the  
149 manufacturer's instructions (Roche Diagnostics, Germany). More detailed information on  
150 AMH measurement has been published previously (Piltonen *et al.*, 2023).

151 The assay limits of detection and quantitation were 0.01 ng/ml and 0.03 ng/ml for AMH.  
152 Intra- and inter-assay coefficients of variance were 1.0–1.8% and 2.9–4.4% for AMH. Limits  
153 above the measuring ranges were 23 ng/ml for AMH.

154 AMH concentrations were converted to pmol/l using 1 ng/ml = 7.14 pmol/l. As AMH levels  
155 are not normally distributed, for the following analysis AMH measurements were transformed  
156 using rank-based inverse normal transformation, as done previously (Ruth *et al.*, 2019). For  
157 rank-based inverse normal transformation we used the package *RNOmni* in R v3.6.3.

#### 158 **Genotyping details and association analysis**

159 Genotyping of the NFBC1966 samples was performed with the Illumina Infinium  
160 HumanCNV370-Duo array. Samples were excluded based on call rate < 95%, gender  
161 mismatch, relatedness (identity by descent (IBD) estimate  $\text{pihat} > 0.2$ ) and outlying  
162 heterozygosity. SNPs were excluded based on missingness rate >5%, HWE  $p < 0.000001$   
163 and MAF <1%. Genotypes were imputed with Beagle 4.1 using the SiSu v3 imputation  
164 reference panel, which consisted of 3775 individuals of Finnish ancestry with sequenced  
165 whole genomes.

166

167 Association analysis was performed using SNPTTEST v2.5.4-beta1, adjusted by the first 10  
168 genetic principal components. Markers with INFO score >0.4 were kept for the meta-  
169 analysis. Positions were converted to build hg37 to harmonise the data with the summary

170 statistics available from Verdiesen *et al.* before running the meta-analysis, using LiftOver  
171 (Kent *et al.*, 2002).  
172

### 173 **GWAS meta-analysis**

174 We conducted an inverse variance weighted fixed-effects meta-analysis with single genomic  
175 control correction using GWAMA software (v2.2.2) (Mägi and Morris, 2010). A total of  
176 13,903,812 variants were included in the meta-analysis of 9,688 AMH measurements. After  
177 meta-analysis we kept variants present in both studies (totalling 7,900,839 variants) for  
178 downstream analysis. Lead SNPs were identified as SNVs independent from each other  
179 with  $P$ -value less than or equal to  $5 \times 10^{-8}$ . The maximum distance between LD blocks of  
180 independent SNPs to merge into a single genomic locus was set to 500 kb.

### 181 **Heritability analysis**

182 The heritability ( $h^2$ ) was estimated by single-trait LD score regression using the meta-  
183 analysis summary statistics and HapMap 3 LD-scores using LDSC v1.0.1  
184 (<https://github.com/bulik/ldsc>) (Bulik-Sullivan *et al.*, 2015).

### 185 **Annotation of GWAS signals**

186 We used FUMA (v1.4.0) to annotate the GWAS signals (Watanabe *et al.*, 2017). FUMA is an  
187 online platform that performs annotation of GWAS signals using data from several  
188 databases. First, FUMA identifies lead SNPs ( $p$ -value  $\leq 5 \times 10^{-8}$  and SNP pairwise LD  
189  $r^2 < 0.1$ , based on 1000G European reference) and independent significant SNPs and each  
190 risk locus ( $p$ -value  $< 5 \times 10^{-8}$  and LD  $r^2 < 0.6$ ) (Supplementary Table 2). Then FUMA  
191 identifies potential candidate SNPs that are in LD with any of the identified independent  
192 significant SNPs and annotates them via linking with several databases (ANNOVAR,  
193 RegulomeDB, CADD scores etc.), which gives information on their location, functional  
194 impact, and potential regulatory effects.

195

196

### 197 **Colocalization analysis**

198

199 We used HyPrColoc (Foley *et al.*, 2021), a colocalisation method for identifying the overlap  
200 between our GWAS meta-analysis signals and cis-quantitative trait loci (cis-QTL) signals  
201 from different tissues and cell types (expression QTLs, transcript QTLs, exon QTLs and  
202 exon usage QTLs available in the eQTL Catalogue (Kerimov *et al.*, 2021)). We lifted the  
203 GWAS summary statistics over to hg38 build to match the eQTL Catalogue using binary  
204 liftOver tool ([https://genome.sph.umich.edu/wiki/LiftOver#Binary\\_liftOver\\_tool](https://genome.sph.umich.edu/wiki/LiftOver#Binary_liftOver_tool)).

205 For the genome-wide significant ( $p < 5 \times 10^{-8}$ ) GWAS loci identified we extracted the +/-  
206 500kb of its top hit from QTL datasets and ran the colocalization analysis against eQTL  
207 Catalogue traits. For each eQTL Catalogue dataset we included all the QTL features which  
208 shared at least 80% of tested variants with the variants present in our GWAS region. We  
209 used the default settings for HyPrColoc analyses and did not specify any sample overlap  
210 argument, because HyPrColoc paper (Foley *et al.*, 2021) demonstrates that assuming trait  
211 independence gives reasonable results. HyPrColoc outputs the posterior probability that  
212 genetic association signals for those traits are colocalising (we considered two or more

213 signals to colocalize if the posterior probability for a shared causal variant (PP4) was 0.8 or  
214 higher). All results with a PP4 > 0.8 can be found in Supplementary Table 3.

## 215 **Gene prioritization**

216 In order to nominate plausible candidate genes in each locus, we prioritized genes according  
217 to different levels of evidence: (1) genes containing lead variants that are coding variants or  
218 coding variants in high LD ( $r^2 > 0.6$ ) with lead variants; (2) genes whose expression was  
219 regulated by eQTL variants that showed significant (posterior probability >0.8) colocalization  
220 with our GWAS signals; (3) genes which showed a plausible biological role as defined  
221 previously in the research literature.

## 222 **Gene set and tissue set enrichment analysis**

223 Gene set enrichment analysis and tissue set enrichment analysis were performed using  
224 MAGMA v1.08 implemented in FUMA v1.4.0. Gene sets were obtained from Msigcbv7.0 for  
225 'Curated gene sets' and 'GO terms'. A total of 15,485 gene terms were queried. The results  
226 of this analysis are presented in Supplementary Table 4 and Supplementary Figure 2.  
227 Tissue expression analysis was performed for 53 tissue types using MAGMA. The results of  
228 this analysis are presented in Supplementary Table 5 and Supplementary Figure 2.

## 229 **Genetic correlation analysis**

230 The Complex Traits Genetics Virtual Lab (CTG-VL, <https://vl.genoma.io/>) was used to  
231 calculate genetic correlations between the AMH meta-analysis and 1335 traits. We applied a  
232 multiple testing correction (Benjamini-Hochberg FDR < 5%) to determine statistical  
233 significance using the *p.adjust* function in R 3.6.3. Results of the genetic correlation analysis  
234 are presented in Supplementary Figure 3 and Supplementary Table 6.

235

## 236 **Phenome-wide associations**

237

238 We evaluated the association of our GWAS lead variants and variants in high LD with these  
239 by using human health traits and phenotypes available in the GWAS Catalog (e0\_r2022-11-  
240 29) as implemented in FUMA. We also queried the lead variants of this study from the  
241 FinnGen study (data freeze 9, total n=377,277), which combines samples collected from  
242 Finnish biobanks to digital health care data (Kurki *et al.*, 2023). The results obtained are  
243 found in Supplementary Table 7 and 8 and Supplementary Figure 4.

244

245

246

247

248

249

250

## 251 **RESULTS**

252

### 253 **Genome-wide association study for AMH levels**

254 To detect genetic factors associated with circulating AMH levels, we performed a GWAS  
255 meta-analysis with data from two studies (NFBC1966 GWAS and summary statistics publicly

256 available from Verdiesen *et al.*, 2022 including a total of 9,668 AMH measurements  
257 quantified from women of pre-menopausal age and European ancestry.

258 The meta-analysis identified a total of six associated loci, with six independent signals  
259 significantly associated with AMH levels ( $P \leq 5 \times 10^{-8}$ ) (Table 1, Supplementary Figure  
260 1). A total of 70 SNPs reached genome-wide significance ( $P \leq 5 \times 10^{-8}$ ).

261





266 levels and the x axis represents the chromosomal positions of the variants. Each lead variant  
 267 is shown as a purple diamond in each of the six genetic loci defined.

268 **Table 1. Genome-wide significant signals ( $p \leq 5 \times 10^{-8}$ ) in the meta-analysis for**  
 269 **inverse normally transformed anti-Müllerian hormone levels in women. SNPs showing**  
 270 **the most significant associations at each locus are shown, and novel genome-wide**  
 271 **significant signals are highlighted in bold. EUR; European (non-Finnish), FINN:**  
 272 **European (Finnish)**

273

| rsID (lead variant) | Chromosome | Position (based on build 37) | Effect allele | Effect allele frequency (EUR/FINN) | Beta (SE)           | P-value                                  | Candidate gene         | Source of support for candidate gene prioritisation        |
|---------------------|------------|------------------------------|---------------|------------------------------------|---------------------|------------------------------------------|------------------------|------------------------------------------------------------|
| rs6729614           | 2          | 145644874                    | G             | 0.26/0.25                          | 0.08 (0.01)         | $5.56 \times 10^{-11}$                   | <i>ZEB2/TEX41</i>      | Colocalisation analysis and biological plausibility        |
| <b>rs10093345</b>   | <b>8</b>   | <b>37872776</b>              | <b>T</b>      | <b>0.72/0.68</b>                   | <b>-0.08 (0.01)</b> | <b><math>5.05 \times 10^{-09}</math></b> | <b><i>EIF4EBP1</i></b> | <b>Colocalisation analysis and biological plausibility</b> |
| <b>rs762643</b>     | <b>14</b>  | <b>54422767</b>              | <b>T</b>      | <b>0.44/0.41</b>                   | <b>-0.07 (0.01)</b> | <b><math>3.99 \times 10^{-09}</math></b> | <b><i>BMP4</i></b>     | <b>Colocalisation analysis and biological plausibility</b> |

|                    |           |                 |          |                    |                        |                                              |                     |                                                                       |
|--------------------|-----------|-----------------|----------|--------------------|------------------------|----------------------------------------------|---------------------|-----------------------------------------------------------------------|
| rs10417628         | 19        | 2251817         | C        | 0.97/0.99          | 0.32<br>(0.04)         | 9.56<br>$\times 10^{-12}$                    | <i>AMH</i>          | Coding variant and biological plausibility                            |
| rs16991615         | 20        | 5948227         | A        | 0.06/0.02          | 0.16<br>(0.02)         | 4.68<br>$\times 10^{-09}$                    | <i>MCM8</i>         | Coding variant and biological plausibility                            |
| <b>rs186430430</b> | <b>22</b> | <b>29103598</b> | <b>C</b> | <b>0.002/0.008</b> | <b>0.79<br/>(0.12)</b> | <b>9.69<br/><math>\times 10^{-11}</math></b> | <b><i>CHEK2</i></b> | <b>Frameshift variant c.1100delC in high LD with the lead variant</b> |

274

275

276 Three of the associated loci were previously reported and were located in or near *AMH*  
 277 (rs10417628,  $p=9.34 \times 10^{-09}$ ), *TEX41* (rs6729614,  $p=1.68 \times 10^{-10}$ ) and *MCM8* (rs16991615,  
 278  $p=4.68 \times 10^{-09}$ ) (Ruth *et al.*, 2019; Verdiesen *et al.*, 2022), and three of the associated loci  
 279 were novel. The novel loci included associations near *EIF4EBP1* (rs10093345,  $p=9.34 \times 10^{-09}$ ),  
 280 *BMP4* (rs762643,  $p=1.98 \times 10^{-09}$ ) and *CHEK2* (rs186430430,  $p=9.69 \times 10^{-11}$ ) (see Figure  
 281 1, Table 1). All lead variants were present in the two datasets analysed, and the directions of  
 282 effects were consistent between the datasets for all six lead variants (Figure 2).

283 There was no evidence of excessive genomic inflation ( $\lambda_{GC} = 1.01$ ) in the GWAS meta-  
 284 analysis (LDSC intercept= 1.0039 (s.e. 0.0076)). The observed scale SNP heritability  
 285 estimate was 0.13 (s.e. 0.05).

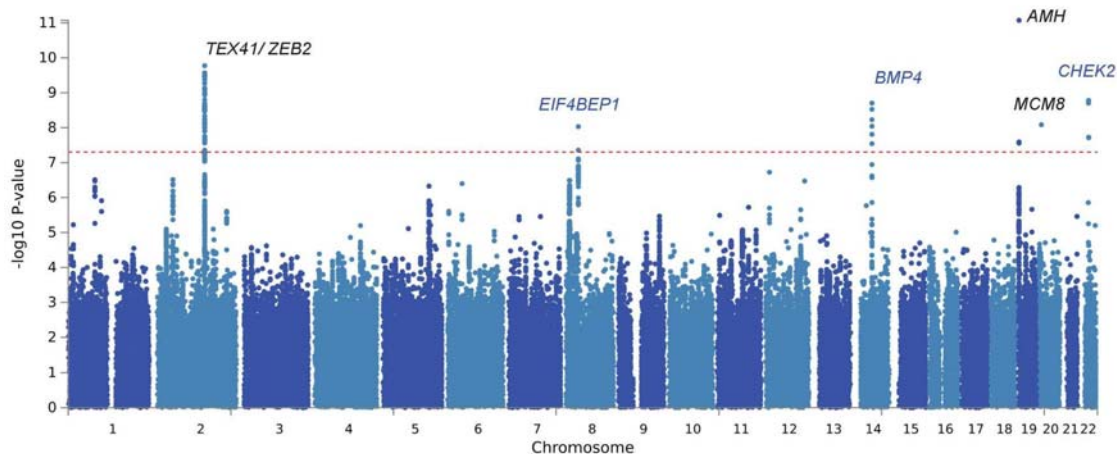

286

287 **Figure 1. Manhattan plot for GWAS meta-analysis for AMH levels in pre-menopausal**  
 288 **women (n=9,668).** The novel loci are highlighted in blue. The y axis represents  $-\log_{10}(P$ -  
 289 values) for association of variants with AMH levels and the x axis represents the  
 290 chromosomal positions of the variants. The red horizontal dashed line represents the  
 291 threshold for genome-wide significance ( $P < 5 \times 10^{-8}$ ).

292

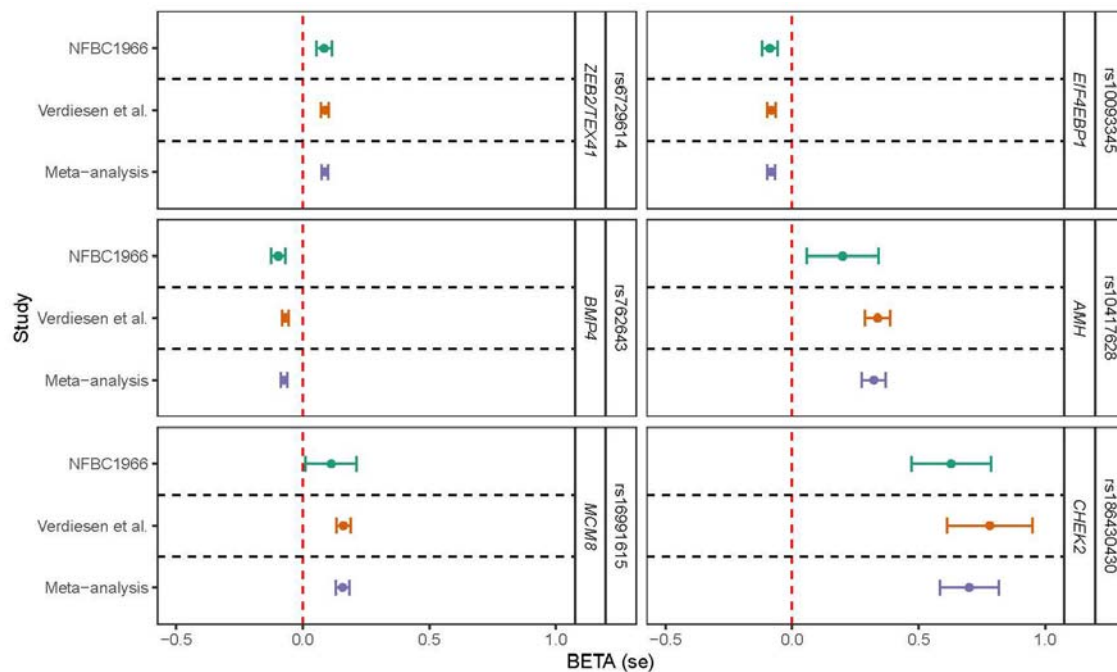

293

294 **Figure 2. Forest plot of effect estimates for the 6 lead variants associated with AMH**  
 295 **levels across datasets meta-analysed.** The betas and standard errors are shown for the  
 296 two studies meta-analysed (NFBC1966 (green dots,  $n=2,619$ ), Verdiesen *et al.* (orange dots,  
 297  $n=7,049$ ), and the presented largest meta-analysis (Meta-analysis, purple dots,  $n=9,668$ ).  
 298 Candidate genes are also shown next to each genetic lead signal. Betas represent the effect  
 299 sizes of each genetic variant association to phenotype, assessing the same risk allele across  
 300 cohorts (Effect allele and effect allele frequency are reported in Table 1).

301

## 302 Characterisation of GWAS signals

303 Two out of the six lead variants that were detected are non-synonymous, making them  
304 notably easier to interpret and establishing a more solid foundation for pinpointing potential  
305 candidate genes. These non-synonymous variants are found in *AMH* (Anti-Mullerian  
306 Hormone) (rs10417628 in chromosome 19,  $p=9.56 \times 10^{-12}$ ) and *MCM8* (Minichromosome  
307 Maintenance 8 Homologous Recombination Repair Factor) (rs16991615 in chromosome 20,  
308  $p=4.68 \times 10^{-09}$ ) and were previously described to be associated with AMH levels (Ruth *et al.*,  
309 2019; Verdiesen *et al.*, 2022).

310 In the novel locus identified on chromosome 22, the lead variant is an intronic variant near  
311 *CHEK2* (Checkpoint Kinase 2) (rs186430430,  $p=9.69 \times 10^{-11}$ ). Interestingly, this variant is in  
312 complete linkage disequilibrium ( $r^2=1$ ) with the frameshift variant c.1100delC in *CHEK2*  
313 (rs555607708). Despite complete linkage disequilibrium, this rare variant is only found in the  
314 association analysis of the NFBC1966 GWAS, showing a p-value of  $6.69 \times 10^{-05}$  and beta of  
315 0.79 (s.e.=0.12) in this cohort only and not found in the summary statistics results from  
316 Verdiesen *et al.*, likely explained by the fact that this variant is enriched in the Finnish  
317 population (MAF= 0.008) compared to other European populations (MAF=0.002), and thus  
318 better powered to be captured in a GWAS setting including the former population in the  
319 analysis.

320 For the other three loci identified on chromosomes 2, 8 and 14, we defined for the first time  
321 plausible shared causal variants between GWAS signals and transcript and gene expression  
322 in specific tissues by colocalization analysis. This resulted in the prioritisation of three  
323 plausible candidate genes, respectively: *TEX41* (Testis Expressed 41), *EIF4EBP1*  
324 (Eukaryotic Translation Initiation Factor 4E Binding Protein 1) and *BMP4* (Bone  
325 Morphogenetic Protein 4) (Supplementary Table 3).

326 For instance, the association signal in chromosome 2, in an intronic region of *TEX41*,  
327 colocalized with eQTL signals for *TEX1* transcripts ENST00000414256 in the testis  
328 (PP4=0.99) and ENST00000445791 in the skin (PP4=1). *EIF4EBP1* was also prioritised  
329 based on colocalization evidence in three tissues, with high colocalization probability  
330 (PP4=0.90) between the GWAS signal and cis-eQTLs for *EIF4EBP1* expression in brain  
331 frontal cortex tissue, and between the GWAS signal and cis-eQTLs for *EIF4EBP1*  
332 expression in left heart ventricle. Additionally, the GWAS association signal in chromosome  
333 8 showed colocalization with cis-eQTLs for *BMP4* transcripts ENST00000245451 and  
334 ENST00000558489 in colon transverse (PP4=0.84) and *BMP4* transcript  
335 ENST00000558489 in tibial nerve.

336 From colocalization results, only in the locus of chromosome 2, we observed that the  
337 associations might be explained by a single variant. Namely, we observed that the non-  
338 coding transcript (*TEX41*) exon variant rs17407477 and the intronic variant rs786244 were  
339 explaining most of the shared association, for the testis transcript expression association  
340 (posterior inclusion probability 0.90) and the skin transcript expression association (posterior  
341 inclusion probability 0.94), respectively.

342 Although we identified three out of the four signals that were previously reported in  
343 Verdiesen *et al.*, 2022, we were unable to detect the signal near *CDCA7* described in the  
344 past work (rs11683493 (T),  $p=1.7 \times 10^{-8}$ ). In our analysis using the NFBC66 GWAS data,  
345 this variant showed a p-value of 0.09 and therefore, the resulting p-value from the meta-  
346 analysis remained below the threshold of significance ( $p=1.02 \times 10^{-5}$ ). Although there might  
347 be various sources of variability which explains this discrepancy in our findings, we  
348 hypothesise the difference in sample size to be the primary reason.

## 349 Gene set and tissue set enrichment analysis

350 Gene set enrichment analysis highlighted significant enrichment of renal system vasculature  
351 morphogenesis ( $p=5.2 \times 10^{-8}$ ), glomerulus vasculature morphogenesis ( $p=1.77 \times 10^{-7}$ ) and  
352 glomerulus morphogenesis ( $p=2.99 \times 10^{-6}$ ) (see Supplementary Table 4 and Supplementary  
353 Figure 2). Tissue expression analysis yielded the strongest enrichment in the pituitary gland,  
354 even though not reaching significance after multiple testing correction ( $p_{\text{non-adj}}=0.02$ ) (see  
355 Supplementary Figure 2 and Supplementary Table 5 and Supplementary Figure 2).

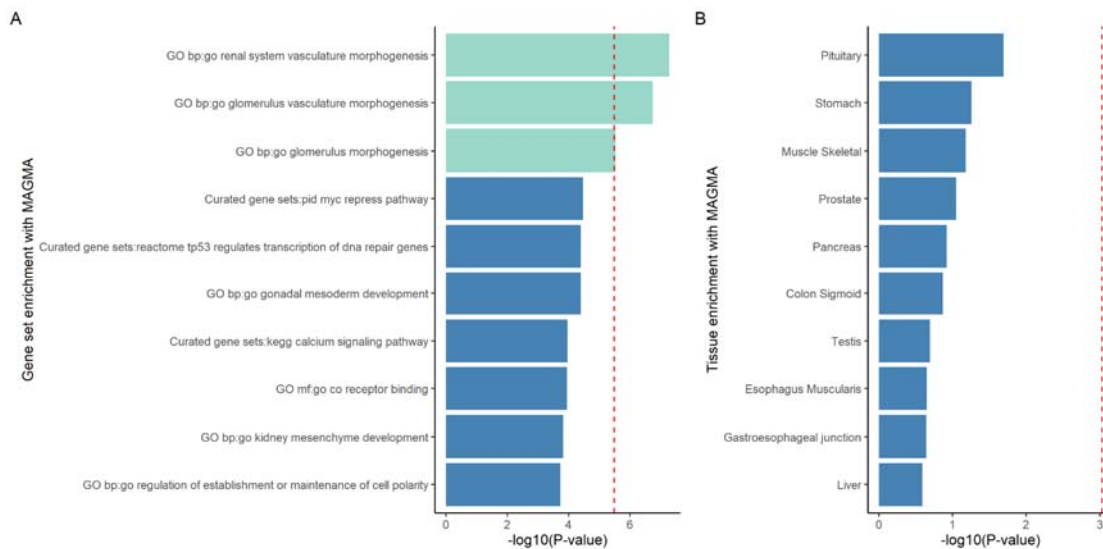

356

357

358 **Supplementary Figure 2. Gene set and tissue set enrichment results. A) Gene set**  
359 **enrichment analyses with MAGMA.** Green bars and the red dashed line indicate  
360 Bonferroni threshold, set to  $p=0.05/15485=3.22 \times 10^{-6}$ . **B) Tissue enrichment analyses**  
361 **with MAGMA.** Red dashed line indicates Bonferroni threshold, set to  $p=0.05/54=0.0009$ .

362

## 363 Genetic correlations of AMH levels with diseases and traits

364 From genetic correlation analysis assessing the relationship between AMH levels and 1,335  
365 traits (summary statistics for those traits are found in <http://www.nealelab.is/uk-biobank/>),  
366 three traits reflecting menopausal timing remained significant after FDR correction, all  
367 displaying very high genetic correlations with AMH levels: 'Age at menopause' ( $r_g=0.95$ ,  
368  $se=0.21$ ,  $p=8.85 \times 10^{-6}$ ), 'Had menopause' (referring to having already undergone  
369 menopause) ( $r_g=-0.99$ ,  $se=0.22$ ,  $p=1.56 \times 10^{-5}$ ) and 'Age started hormone-replacement  
370 therapy (HRT)' (age for initiation of hormone replacement therapy) ( $r_g=0.92$ ,  $se=0.21$ ,  
371  $p=2.05 \times 10^{-5}$ ). Additionally, we observed a range of nominally significant associations  
372 ( $p<0.05$ ) with traits spanning reproductive/hormonal traits (such as polyp of female genital  
373 tract and female genital prolapse), metabolic traits such as inverse relationship with HbA1c

374 and positive correlations with neoplasms such as breast and bowel cancer. (Supplementary  
375 Figure 3 and full results and details can be found in Supplementary Table 6).

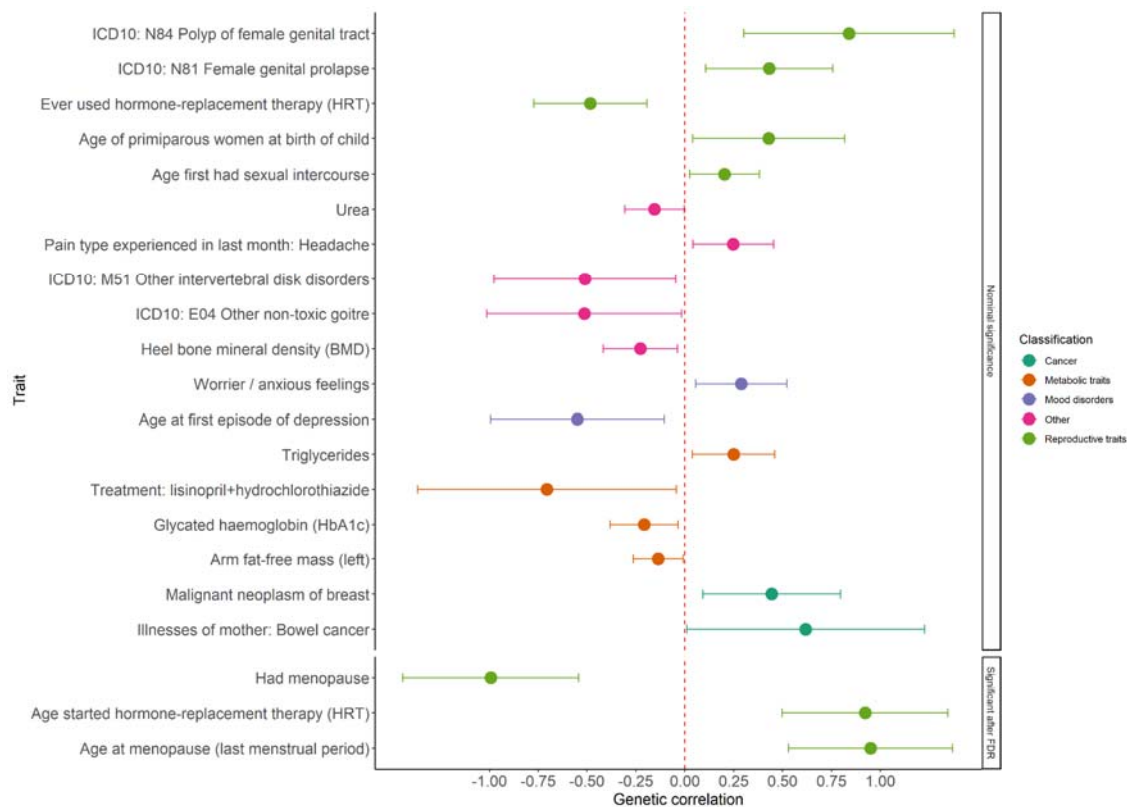

376

377 **Supplementary Figure 3. Genetic correlation results between AMH summary statistics**  
378 **and publicly available summary statistics for other traits.** Out of 1,335 associations, the  
379 lower section depicts significant associations after FDR correction ( $p\text{-adj}<0.05$ ) and the  
380 upper section depicts nominal significant correlations ( $p<0.05$ ). Dots show the estimated  
381 genetic correlation ( $r_g$ ) and error bars indicate 95% confidence limits. Dotted red line  
382 indicates no genetic correlation. ICD10: International Classifications of Diseases 10th  
383 Revision.

### 384 Phenome-wide association study

385 To get more insights into phenotypic manifestations of the AMH-associated variants, we  
386 performed a phenome-wide association study using the GWAS Catalog. We detected that  
387 associated variants in the six loci identified had associations across several traits, spanning  
388 from cardiovascular traits, age at menopause, estradiol levels, heel bone mineral density,  
389 breast cancer, uterine fibroids, PCOS to blood cell counts (Supplementary Table 7 and  
390 Supplementary Figure 3).

391 We performed a further look-up of the lead variants in the FinnGen study (data freeze 9, total  
392  $n=377,277$ ), which combines samples collected from Finnish biobanks to digital health care  
393 data. We detected that two of the lead variants had associations ( $p<1 \times 10^{-5}$ ) with outcomes  
394 in FinnGen, rs762643 (near *BMP4*) associated with cervical disc disorders and hernia, while  
395 rs186430430 (near *CHEK2*) associated with a variety of outcomes including diseases of the

396 genitourinary tract, different neoplasms (e.g. leiomyoma of uterus, neoplasms of ovary), and  
 397 breast-cancer-related outcomes (full results can be found in Supplementary Table 8).

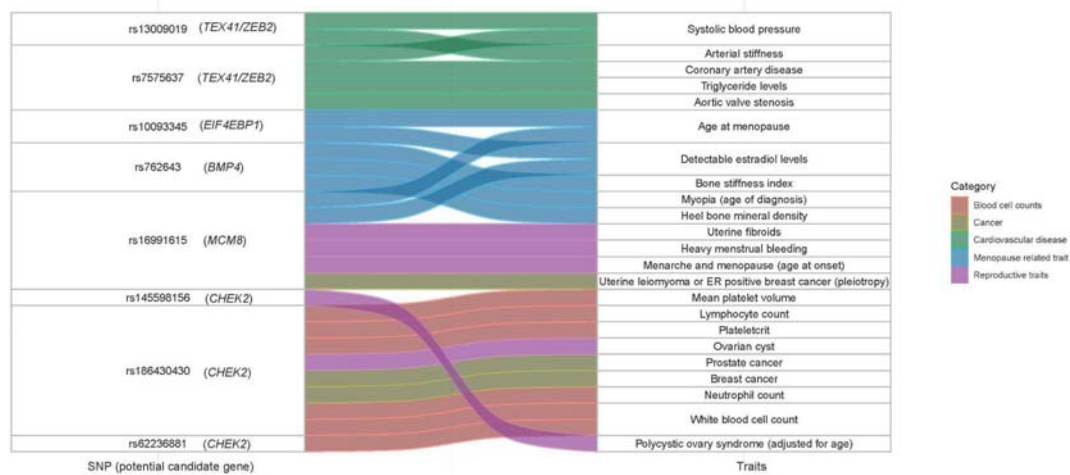

398

399 **Supplementary Figure 4. River plot showing the association between lead variants (or**  
 400 **variants in high LD with these) identified in our AMH GWAS (left column) and**  
 401 **independent traits which show significant association results for respective variants**  
 402 **in the GWAS Catalog (right column).**

403

## 404 DISCUSSION

405 Our GWAS meta-analysis of circulating AMH measurements in 9,668 pre-menopausal  
 406 women, including 2,619 measurements from women at age 31 years old from the  
 407 NFBC1966, identified three novel association signals near *EIF4EBP1*, *BMP4* and *CHEK2*.  
 408 We also detected three previously identified signals near *TEX41*, *MCM8*, and *AMH*  
 409 (Verdiesen *et al.*, 2022).

410 *CHEK2* was one of the most interesting associated loci. Of note, the lead variant near  
 411 *CHEK2* (rs186430430,  $p=9.69 \times 10^{-11}$ , MAF= 0.002) is in complete linkage disequilibrium  
 412 ( $r^2=1$ ) with a frameshift variant, c.1100delC (rs555607708, found in NFBC GWAS only,  
 413  $p=6.69 \times 10^{-05}$ , OR=1.87, 95% CI= 1.37-2.55), as it is enriched in the Finnish population  
 414 (MAF=0.008) compared to other non-Finnish and non-Estonian European populations  
 415 (MAF=0.002) (Tyrmi *et al.*, 2022). Apart from being known as a moderate risk gene for  
 416 breast cancer, different GWA studies highlighted loss of function alleles in *CHEK2* to be  
 417 associated with firstly, PCOS (Tyrmi *et al.*, 2021) and secondly, with ovarian ageing  
 418 (assessed as age at natural menopause) (Ruth *et al.*, 2021). Furthermore, recent research  
 419 done with exome data has also identified an association between *CHEK2* truncating variants  
 420 (excluding c.1110delC) and later age at menarche (Kentistou *et al.*, 2023).

421 *CHEK2* encodes a checkpoint kinase 2, which induces cell cycle arrest and apoptosis in  
 422 response to DNA damage (Ahn *et al.*, 2004), also in oocytes with unrepaired DNA damage  
 423 (Ruth *et al.*, 2021). In the work from Ruth *et al.*, 2021 Chek2<sup>-/-</sup> female mice showed reduced  
 424 follicular atresia around reproductive senescence, increased follicular response to

425 gonadotrophin stimulation, and also elevated AMH levels around reproductive senescence.  
426 Our finding goes in line with this research and supports the hypothesis that loss of function in  
427 *CHEK2* might result in decreased follicular atresia and higher AMH levels also in young  
428 premenopausal women.

429 In our general meta-analysis, we also detected previously identified associations of a  
430 missense variant in *MCM8* (Ruth *et al.*, 2019; Verdiesen *et al.*, 2022), a known DNA repair  
431 gene (Park *et al.*, 2013). This missense variant has been associated previously with  
432 premature ovarian failure, infertility, age at menopause (Day *et al.*, 2015) and cancer  
433 (Michailidou *et al.*, 2017; Griffin and Trakselis, 2019; Lutzmann *et al.*, 2019). However, this  
434 association was the weakest in NFBC66 alone. While this could support an age-specific  
435 effect of the missense variant, as supported in Verdiesen *et al.* upon identifying a negative  
436 effect direction for the cohort including adolescents versus older cohorts, this discrepancy  
437 might be as well due to the variant's lower frequency in the Finnish population (MAF=0.02  
438 compared to MAF=0.06 in other European populations) and a smaller sample size in the  
439 NFBC1966 study. Further research including age-stratified groups with AMH levels available  
440 and genetic data might inform potential age-specific effects of genetic signals.

441

442 Regarding the missense variant in the *AMH* gene also reported in Verdiesen *et al.*, the  
443 association between the missense variant rs10417628 in the *AMH* gene and AMH levels  
444 remains unclear in the current analysis. A case report from 2020 suggested that this variant  
445 reduces AMH detection without affecting its bioactivity (Hoyos *et al.*, 2020). Previous GWAS  
446 meta-analysis also provided inconclusive results due to inconsistent evidence from different  
447 assay data. In the NFBC66 study using an automated assay (Elecsys® AMH Plus), the  
448 missense variant showed a p-value of 0.15 (n=2,619), supporting the hypothesis of a  
449 detection issue rather than an actual difference in AMH bioactivity. However, comparing  
450 AMH values from different assays remains problematic, and recent evidence suggests lower  
451 values in automated assays compared to Gen II and Ansh Labs assay (Moolhuijsen and  
452 Visser, 2020). Further research is needed to validate the association between rs10417628  
453 and AMH levels using different assays.

454 Colocalization analysis supports regulatory effects of GWAS variants associated with AMH  
455 with genetic variants modifying expression levels of *TEX41*, *BMP4* and *EIF4EBP1* and thus  
456 provides a refinement for the characterization of possible regulatory effects of the genetic  
457 variants on different transcripts and genes.

458 Interestingly, we observed high posterior probability (PP4=0.99) of colocalization between  
459 our GWAS signal and eQTL signal for the *TEX41* (Testis expressed 41) transcript  
460 ENST00000414256 in the testis, prioritising this long non-coding RNA gene for the first time  
461 in association with AMH levels based on colocalization analysis. In the same locus, *ZEB2*  
462 shows biological plausibility as a candidate gene since it plays a role as inhibitor of signal  
463 transduction in TGF- $\beta$  and BMP signalling through interaction with ligand-activated SMAD  
464 proteins (Postigo *et al.*, 2003; Conidi *et al.*, 2011).

465 Colocalization analysis also supported the nomination of *EIF4EBP1* in the novel locus  
466 identified in chromosome 8. This gene encodes a translation repressor protein that  
467 competitively binds to eukaryotic translation initiation factor 4E (EIF4E) (Gingras *et al.*, 1999;  
468 Harris and Lawrence, 2003) and is a major substrate of mTOR and a key player in mTOR  
469 signalling pathway. Studies show that both EIF4EBP1 and EIF4E are involved in cancer  
470 development and progression where up-regulated EIF4E plays an oncogenic role in



471 carcinogenesis (Heikkinen *et al.*, 2013; Cha *et al.*, 2015). The same intergenic lead variant in  
472 this locus has been associated with age at menopause, and other menopause-related traits  
473 (ever had menopause and ever used hormone-replacement therapy), supporting a plausible  
474 association with AMH levels.

475 We observed colocalization between our GWAS signal and variants modulating gene  
476 expression of *BMP4*. *BMP4* has a known regulatory role on AMH expression through  
477 activation of the SMAD proteins (Estienne *et al.*, 2015; Pierre *et al.*, 2016). Smad interacting  
478 protein 1 (also known as *ZEB2*) is one of the plausible candidate genes in chromosome 2,  
479 which would as well interact with SMAD proteins and participate in AMH regulation (Postigo  
480 *et al.*, 2003).

481 Our GWAS of AMH measurements revealed significant enrichment in renal system vascular  
482 morphogenesis, glomerulus vascular morphogenesis, and glomerulus morphogenesis gene  
483 set analysis. This supports the close connection between urinary and reproductive system  
484 development, originating from a common embryological origin, the intermediate mesoderm.  
485 Additionally, in our gene set enrichment results, we observed a nominal significance  
486 association with the gonadal mesoderm gene set ( $p=4.2 \times 10^{-5}$ ), further supporting the  
487 interconnectedness of the urinary and reproductive systems during development. We  
488 propose that this observation may be linked to the identification of *BMP4* locus associated  
489 with AMH levels. The *BMP4* signalling pathway is crucial during kidney development,  
490 including ureteric bud outgrowth (Grinspon and Rey, 2014; Nishinakamura and Sakaguchi,  
491 2014; Oxburgh *et al.*, 2014). This observation suggests that genetic variants affecting the  
492 renal system's development and function could influence AMH levels in women later in life.  
493 To gain further insight, studying AMH levels in younger cohorts and conducting sex-stratified  
494 analyses may be valuable in understanding the association between urogenital development  
495 and AMH levels in postnatal stages.

496 Tissue expression analysis also identified enrichment in the pituitary gland, although this did  
497 not reach significance after multiple testing correction. This result goes in line with research  
498 from recent years showing that AMH has versatile actions in different levels of the  
499 hypothalamus-pituitary-gonadal axis (Silva and Giacobini, 2021), further supporting the  
500 developmental alterations of neuroendocrine circuits regulating fertility.

501 We identified three significant genetic correlations which align with the observations in  
502 Verdiesen *et al.*, indicating a strong positive genetic correlation between AMH and traits  
503 reflecting age at menopause, suggesting shared underlying genetic risk factors and  
504 supporting AMH as a proxy for ovarian reserve. We also found interesting nominal significant  
505 associations, pointing towards a shared genetic background between AMH levels and breast  
506 cancer, consistent with epidemiological studies (Ge *et al.*, 2018). We hypothesise both  
507 *MCM8* and *CHEK2* loci may play a role in this relationship and Mendelian randomisation  
508 studies with independent samples could further investigate this association's direction.

509 Upon querying the AMH GWAS lead variants and variants in high linkage disequilibrium with  
510 those in other traits, we found shared significant signals amongst known epidemiological  
511 associations (Homburg and Crawford, 2014; De Kat *et al.*, 2017; Ge *et al.*, 2018;  
512 Moolhuijsen and Visser, 2020) with AMH such as PCOS, breast cancer, postmenopausal  
513 status (age at menopause, estradiol levels, heel bone mineral density) and cardiovascular  
514 disease. Additionally, we observed novel associations with other traits in European ancestry  
515 studies, including uterine fibroids (coming from signal in *MCM8*) and blood cell counts  
516 (coming from signals near *CHEK2*, which has been also associated recently with clonal  
517 hematopoiesis (Kar *et al.*, 2022). Further epidemiological studies assessing the potential

518 causal relationships between these traits and AMH levels are warranted to better understand  
519 the mechanisms underlying these associations.

520 Our study has several strengths, including a large sample size and inclusion of a founder  
521 population, which allowed us to identify novel rare variants associated with AMH levels.  
522 Furthermore, a younger cohort and equal age of measurement from 2,619 women increases  
523 the variability of AMH levels and boosts the power to detect associations. We also performed  
524 colocalization analysis for the first time, which provides a refinement for the characterization  
525 of possible regulatory effects of the genetic variants on different transcripts and genes and  
526 detect significant gene set enrichment. Our study has some limitations to consider. First, we  
527 only included women of European ancestry, and our findings may not be generalizable to  
528 other populations. Second, as with other reproductive phenotypes, the lack of sufficiently  
529 sized datasets from relevant tissue in commonly used gene expression databases hinders a  
530 more reliable assessment of the mechanisms underlying regulatory effects in reproductive  
531 tissues.

532 In conclusion, our study expands our understanding of the genetic determinants of serum  
533 AMH levels in pre-menopausal women by identifying new loci associated with serum AMH  
534 concentration. Our results highlight the increased power of founder populations and larger  
535 sample sizes to boost the discovery of novel trait-associated variants underlying variation in  
536 AMH levels and to explore plausible genetic regulatory effects of the variants identified.  
537 Further studies are needed to validate our findings and to explore the biological mechanisms  
538 underlying the identified associations.

539

## 540 **Acknowledgments**

541 We want to thank the participants and investigators of the FinnGen study and the NFBC1966  
542 study. Part of the computations were performed in the High-Performance Computing Center  
543 of University of Tartu.

544

## 545 **Bibliography**

- 546 Ahn J, Urist M, Prives C. The Chk2 protein kinase. *DNA Repair (Amst)* [Internet]  
547 2004;**3**:1039–1047. DNA Repair (Amst).
- 548 Bulik-Sullivan B, Loh PR, Finucane HK, Ripke S, Yang J, Patterson N, Daly MJ, Price AL,  
549 Neale BM, Corvin A, *et al.* LD score regression distinguishes confounding from  
550 polygenicity in genome-wide association studies. *Nat Genet* 2015;**47**:291–295. Nature  
551 Publishing Group.
- 552 Cha YL, Li PD, Yuan LJ, Zhang MY, Zhang YJ, Rao HL, Zhang HZ, Zheng XFS, Wang HY.  
553 EIF4EBP1 overexpression is associated with poor survival and disease progression in  
554 patients with hepatocellular carcinoma. *PLoS One* [Internet] 2015;**10**:. PLoS One.
- 555 Conidi A, Cazzola S, Beets K, Coddens K, Collart C, Cornelis F, Cox L, Joke D, Dobрева  
556 MP, Dries R, *et al.* Few Smad proteins and many Smad-interacting proteins yield  
557 multiple functions and action modes in TGF $\beta$ /BMP signaling in vivo. *Cytokine Growth*  
558 *Factor Rev* [Internet] 2011;**22**:287–300. Cytokine Growth Factor Rev.
- 559 Day FR, Ruth KS, Thompson DJ, Lunetta KL, Pervjakova N, Chasman DI, Stolk L, Finucane  
560 HK, Sulem P, Bulik-Sullivan B, *et al.* Large-scale genomic analyses link reproductive  
561 aging to hypothalamic signaling, breast cancer susceptibility and BRCA1-mediated  
562 DNA repair. *Nat Genet* [Internet] 2015;**47**:1294–1303. Nat Genet.
- 563 Estienne A, Pierre A, Clemente N Di, Picard JY, Jarrier P, Mansanet C, Monniaux D, Fabre

- 564 S. Anti-Müllerian hormone regulation by the bone morphogenetic proteins in the sheep  
565 ovary: deciphering a direct regulatory pathway. *Endocrinology* [Internet] 2015;**156**:301–  
566 313. *Endocrinology*.
- 567 Finkelstein JS, Lee H, Karlamangla A, Nee RM, Slus PM, Burnett-Bowie SAM, Darakananda  
568 K, Donaho PK, Harlo SD, Prizan SH, *et al.* Antimüllerian Hormone and Impending  
569 Menopause in Late Reproductive Age: The Study of Women’s Health Across the  
570 Nation. *J Clin Endocrinol Metab* [Internet] 2020;**105**:E1862–E1871. *J Clin Endocrinol*  
571 *Metab*.
- 572 Foley CN, Staley JR, Breen PG, Sun BB, Kirk PDW, Burgess S, Howson JMM. A fast and  
573 efficient colocalization algorithm for identifying shared genetic risk factors across  
574 multiple traits. *Nat Commun* [Internet] 2021;**12**:. *Nat Commun*.
- 575 Ge W, Clendenen T V., Afanasyeva Y, Koenig KL, Agnoli C, Brinton LA, Dorgan JF,  
576 Eliassen AH, Falk RT, Hallmans G, *et al.* Circulating anti-Müllerian hormone and breast  
577 cancer risk: A study in ten prospective cohorts. *Int J cancer* [Internet] 2018;**142**:2215–  
578 2226. *Int J Cancer*.
- 579 Gingras AC, Raught B, Sonenberg N. eIF4 initiation factors: effectors of mRNA recruitment  
580 to ribosomes and regulators of translation. *Annu Rev Biochem* 1999;**68**:913–963.  
581 United States.
- 582 Griffin WC, Trakselis MA. The MCM8/9 complex: A recent recruit to the roster of helicases  
583 involved in genome maintenance. *DNA Repair (Amst)* [Internet] 2019;**76**:1–10. *DNA*  
584 *Repair (Amst)*.
- 585 Grinspon RP, Rey RA. When hormone defects cannot explain it: malformative disorders of  
586 sex development. *Birth Defects Res C Embryo Today* [Internet] 2014;**102**:359–373.  
587 *Birth Defects Res C Embryo Today*.
- 588 Harris TE, Lawrence JCJ. TOR signaling. *Sci STKE* 2003;**2003**:re15. United States.
- 589 Heikkinen T, Korpela T, Fagerholm R, Khan S, Aittomäki K, Heikkilä P, Blomqvist C, Carpén  
590 O, Nevanlinna H. Eukaryotic translation initiation factor 4E (eIF4E) expression is  
591 associated with breast cancer tumor phenotype and predicts survival after anthracycline  
592 chemotherapy treatment. *Breast Cancer Res Treat* [Internet] 2013;**141**:79–88. *Breast*  
593 *Cancer Res Treat*.
- 594 Homburg R, Crawford G. The role of AMH in anovulation associated with PCOS: a  
595 hypothesis. *Hum Reprod* [Internet] 2014;**29**:1117–1121. *Hum Reprod*.
- 596 Hoyos LR, Visser JA, McLuskey A, Chazenbalk GD, Grogan TR, Dumesic DA. Loss of anti-  
597 Müllerian hormone (AMH) immunoactivity due to a homozygous AMH gene variant  
598 rs10417628 in a woman with classical polycystic ovary syndrome (PCOS). *Hum Reprod*  
599 [Internet] 2020;**35**:2294–2302. *Hum Reprod*.
- 600 Kar SP, Quiros PM, Gu M, Jiang T, Mitchell J, Langdon R, Iyer V, Barcena C, Vijayabaskar  
601 MS, Fabre MA, *et al.* Genome-wide analyses of 200,453 individuals yield new insights  
602 into the causes and consequences of clonal hematopoiesis. *Nat Genet* [Internet]  
603 2022;**54**:1155–1166. *Nat Genet*.
- 604 Kat AC De, Monique Verschuren W, Eijkemans MJC, Broekmans FJM, Schouw YT Van Der.  
605 Anti-Müllerian Hormone Trajectories Are Associated With Cardiovascular Disease in  
606 Women: Results From the Doetinchem Cohort Study. *Circulation* [Internet]  
607 2017;**135**:556–565. *Circulation*.
- 608 Kent WJ, Sugnet CW, Furey TS, Roskin KM, Pringle TH, Zahler AM, Haussler and D. The  
609 human genome browser at UCSC. *Genome Res* [Internet] 2002;**12**:996–1006. *Genome*  
610 *Res*.
- 611 Kentistou KA, Kaisinger LR, Stankovic S, Vaudel M, Oliveira EM de, Messina A, Walters RG,  
612 Liu X, Busch AS, Helgason H, *et al.* Understanding the genetic complexity of puberty  
613 timing across the allele frequency spectrum. *medRxiv* [Internet] 2023; Cold Spring  
614 Harbor Laboratory Press Available from:  
615 <https://www.medrxiv.org/content/early/2023/06/20/2023.06.14.23291322>.
- 616 Kerimov N, Hayhurst JD, Peikova K, Manning JR, Walter P, Kolberg L, Samoviča M,  
617 Sakthivel MP, Kuzmin I, Trevanion SJ, *et al.* A compendium of uniformly processed  
618 human gene expression and splicing quantitative trait loci. *Nat Genet* [Internet]

- 619 2021;**53**:1290–1299.
- 620 Kurki MI, Karjalainen J, Palta P, Sipilä TP, Kristiansson K, Donner KM, Reeve MP, Laivuori  
621 H, Aavikko M, Kaunisto MA, *et al.* FinnGen provides genetic insights from a well-  
622 phenotyped isolated population. *Nature* [Internet] 2023;**613**:508–518. *Nature*.
- 623 Lutzmann M, Bernex F, Costa de Jesus C da, Hodroj D, Marty C, Plo I, Vainchenker W,  
624 Tosolini M, Forichon L, Bret C, *et al.* MCM8- and MCM9 Deficiencies Cause Lifelong  
625 Increased Hematopoietic DNA Damage Driving p53-Dependent Myeloid Tumors. *Cell*  
626 *Rep* [Internet] 2019;**28**:2851-2865.e4. *Cell Rep*.
- 627 Mägi R, Morris AP. GWAMA: software for genome-wide association meta-analysis. *BMC*  
628 *Bioinformatics* 2010;**11**:288.
- 629 Michailidou K, Lindström S, Dennis J, Beesley J, Hui S, Kar S, Lemaçon A, Soucy P, Glubb  
630 D, Rostamianfar A, *et al.* Association analysis identifies 65 new breast cancer risk loci.  
631 *Nature* [Internet] 2017;**551**:92–94. *Nature*.
- 632 Moolhuijsen LME, Visser JA. Anti-Müllerian Hormone and Ovarian Reserve: Update on  
633 Assessing Ovarian Function. *J Clin Endocrinol Metab* [Internet] 2020;**105**:. *J Clin*  
634 *Endocrinol Metab*.
- 635 Nishinakamura R, Sakaguchi M. BMP signaling and its modifiers in kidney development.  
636 *Pediatr Nephrol* [Internet] 2014;**29**:681–686. *Pediatr Nephrol*.
- 637 Nordström T, Miettunen J, Auvinen J, Ala-Mursula L, Keinänen-Kiukaanniemi S, Veijola J,  
638 Järvelin M-R, Sebert S, Männikkö M. Cohort Profile: 46 years of follow-up of the  
639 Northern Finland Birth Cohort 1966 (NFBC1966). *Int J Epidemiol* 2022;**50**:1786-1787].  
640 England.
- 641 Oxburgh L, Brown AC, Muthukrishnan SD, Fetting JL. Bone morphogenetic protein signaling  
642 in nephron progenitor cells. *Pediatr Nephrol* [Internet] 2014;**29**:531–536. *Pediatr*  
643 *Nephrol*.
- 644 Park J, Long DT, Lee KY, Abbas T, Shibata E, Negishi M, Luo Y, Schimenti JC, Gambus A,  
645 Walter JC, *et al.* The MCM8-MCM9 complex promotes RAD51 recruitment at DNA  
646 damage sites to facilitate homologous recombination. *Mol Cell Biol* [Internet]  
647 2013;**33**:1632–1644. *Mol Cell Biol*.
- 648 Pierre A, Estienne A, Racine C, Picard JY, Fanchin R, Lahoz B, Alabart JL, Folch J, Jarrier  
649 P, Fabre S, *et al.* The Bone Morphogenetic Protein 15 Up-Regulates the Anti-Müllerian  
650 Hormone Receptor Expression in Granulosa Cells. *J Clin Endocrinol Metab* [Internet]  
651 2016;**101**:2602–2611. *J Clin Endocrinol Metab*.
- 652 Piltonen TT, Komsu E, Morin-Papunen LC, Korhonen E, Franks S, Järvelin M-R, Arffman RK,  
653 Ollila M-M. AMH as part of the diagnostic PCOS workup in large epidemiological  
654 studies. *Eur J Endocrinol* 2023;**188**:547–554. England.
- 655 Postigo AA, Depp JL, Taylor JJ, Kroll KL. Regulation of Smad signaling through a differential  
656 recruitment of coactivators and corepressors by ZEB proteins. *EMBO J* [Internet]  
657 2003;**22**:2453–2462. *EMBO J*.
- 658 Ruth KS, Day FR, Hussain J, Martínez-Marchal A, Aiken CE, Azad A, Thompson DJ,  
659 Knoblochova L, Abe H, Tarry-Adkins JL, *et al.* Genetic insights into biological  
660 mechanisms governing human ovarian ageing. *Nature* [Internet] 2021;**596**:393–397.  
661 *Nature*.
- 662 Ruth KS, Soares ALG, Borges MC, Eliassen AH, Hankinson SE, Jones ME, Kraft P, Nichols  
663 HB, Sandler DP, Schoemaker MJ, *et al.* Genome-wide association study of anti-  
664 Müllerian hormone levels in pre-menopausal women of late reproductive age and  
665 relationship with genetic determinants of reproductive lifespan. *Hum Mol Genet*  
666 [Internet] 2019;**28**:1392–1401. *Hum Mol Genet*.
- 667 Schuh-Huerta SM, Johnson NA, Rosen MP, Sternfeld B, Cedars MI, Reijo Pera RA. Genetic  
668 markers of ovarian follicle number and menopause in women of multiple ethnicities.  
669 *Hum Genet* [Internet] 2012;**131**:1709–1724. *Hum Genet*.
- 670 Silva MSB, Giacobini P. New insights into anti-Müllerian hormone role in the hypothalamic-  
671 pituitary-gonadal axis and neuroendocrine development. *Cell Mol Life Sci* [Internet]  
672 2021;**78**:. *Cell Mol Life Sci*.
- 673 Tyrmi JS, Arffman RK, Pujol-Gualdo N, Kurra V, Morin-Papunen L, Sliz E, FinnGen, Team

674 EBR, Piltonen TT, Laisk T, *et al.* Leveraging Northern European population history;  
675 novel low frequency variants for polycystic ovary syndrome. *medRxiv* [Internet]  
676 2021;2021.05.20.21257510 Available from:  
677 <http://medrxiv.org/content/early/2021/05/24/2021.05.20.21257510.abstract>.  
678 Tyrmi JS, Arffman RK, Pujol-Gualdo N, Kurra V, Morin-Papunen L, Sliz E, Piltonen TT, Laisk  
679 T, Kettunen J, Laivuori H. Leveraging Northern European population history: novel low-  
680 frequency variants for polycystic ovary syndrome. *Hum Reprod* [Internet] 2022;**37**:352–  
681 365. Hum Reprod.  
682 Verdiesen RMG, Schouw YT Van Der, Gils CH Van, Verschuren WMM, Broekmans FJM,  
683 Borges MC, Gonçalves Soares AL, Lawlor DA, Eliassen AH, Kraft P, *et al.* Genome-  
684 wide association study meta-analysis identifies three novel loci for circulating anti-  
685 Müllerian hormone levels in women. *Hum Reprod* [Internet] 2022;**37**:1069–1082.  
686 Oxford University Press.  
687 Watanabe K, Taskesen E, Bochoven A van, Posthuma D. Functional mapping and  
688 annotation of genetic associations with FUMA. *Nat Commun* 2017;**8**:1826.  
689 Weenen C, Laven JSE, Bergh ARM von, Cranfield M, Groome NP, Visser JA, Kramer P,  
690 Fauser BCJM, Themmen APN. Anti-Müllerian hormone expression pattern in the  
691 human ovary: potential implications for initial and cyclic follicle recruitment. *Mol Hum*  
692 *Reprod* [Internet] 2004;**10**:77–83. Mol Hum Reprod.  
693

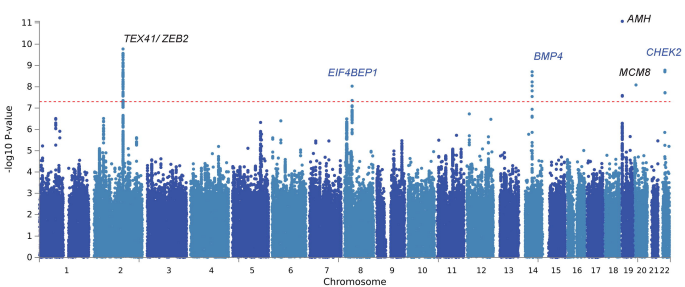

Study

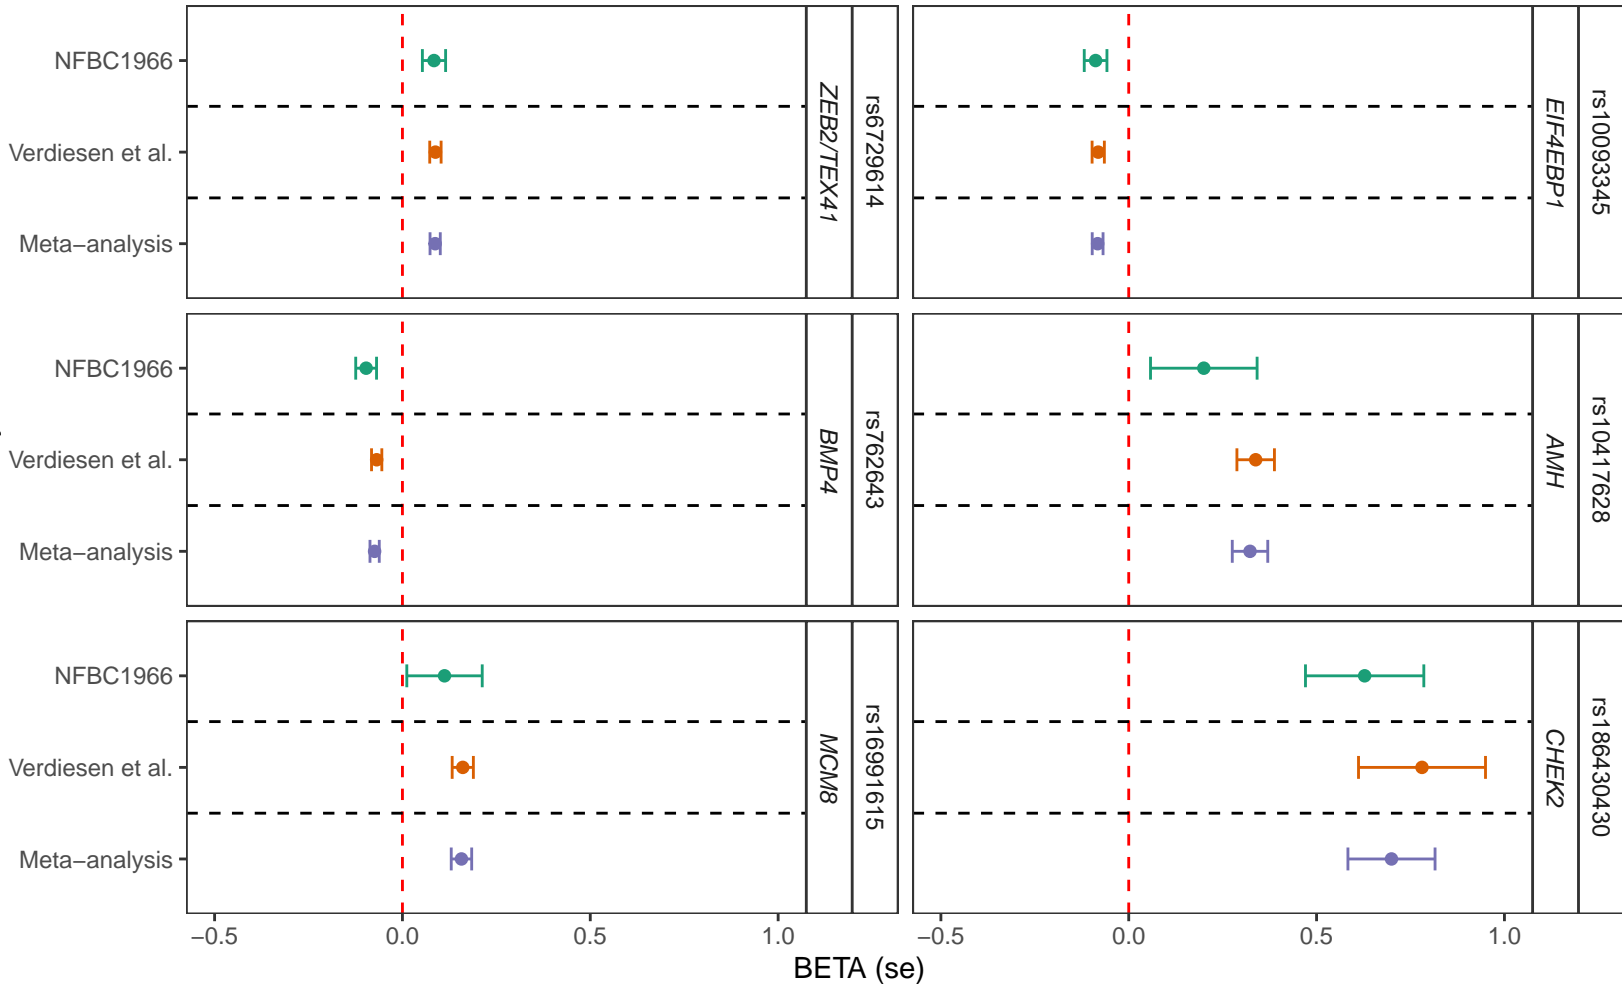

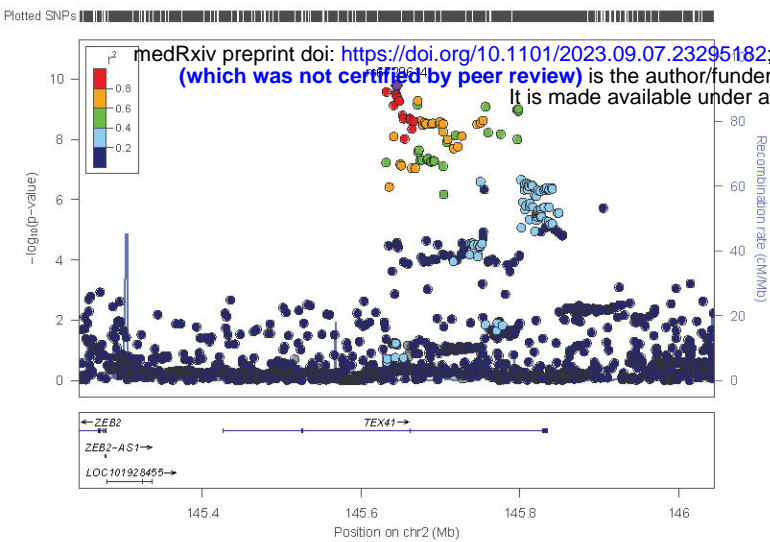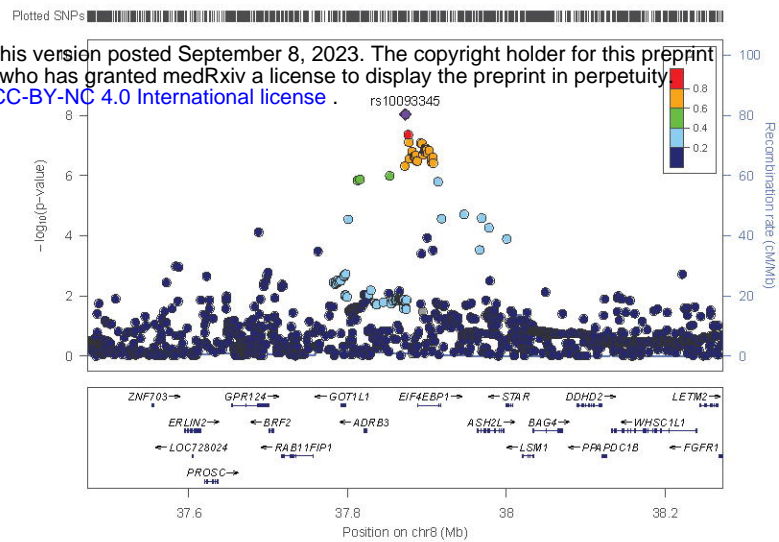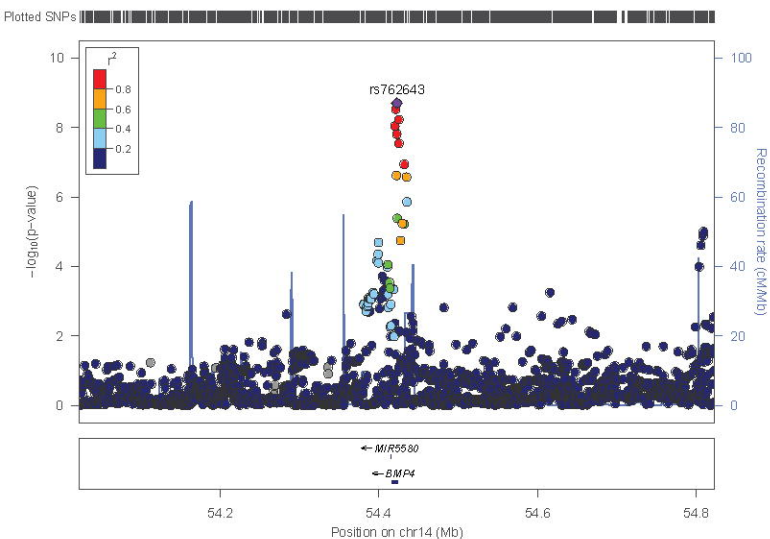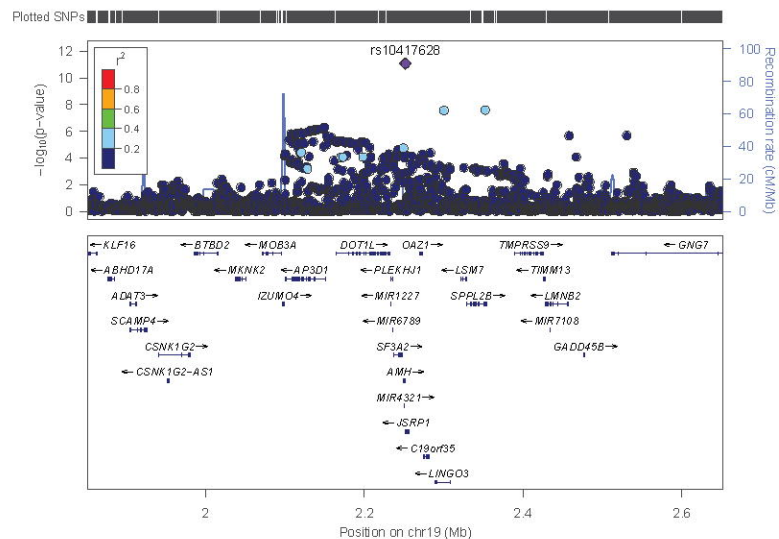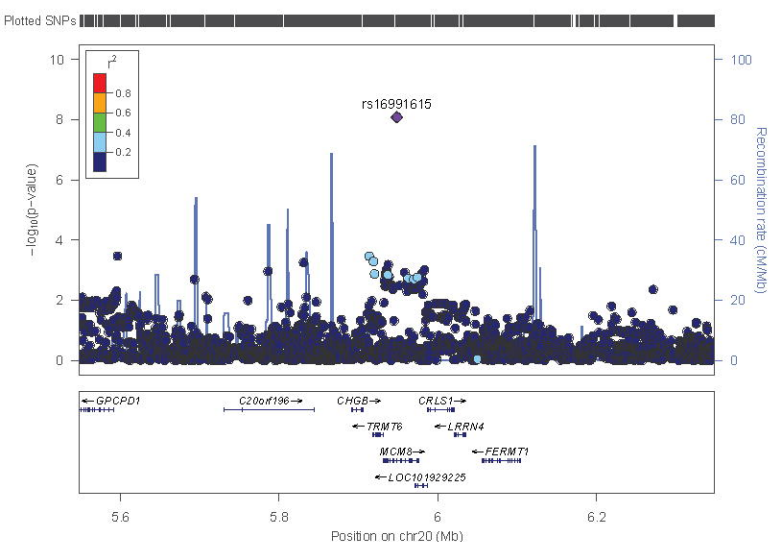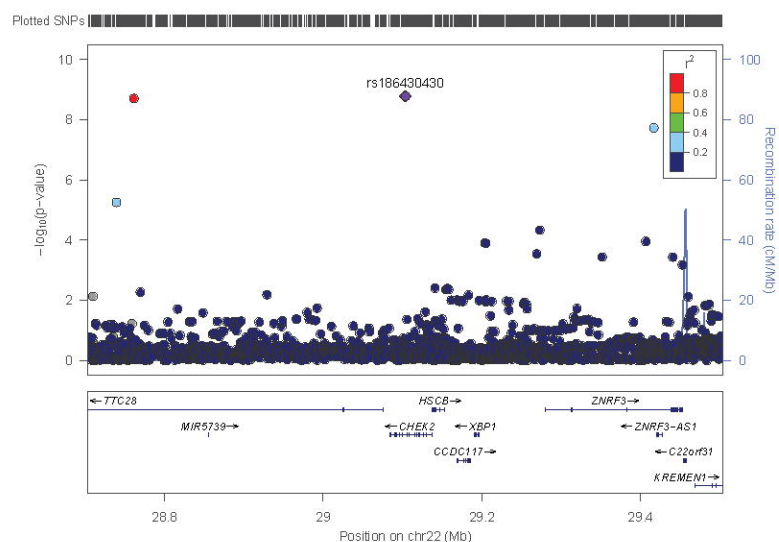



A

Gene set enrichment with MAGMA

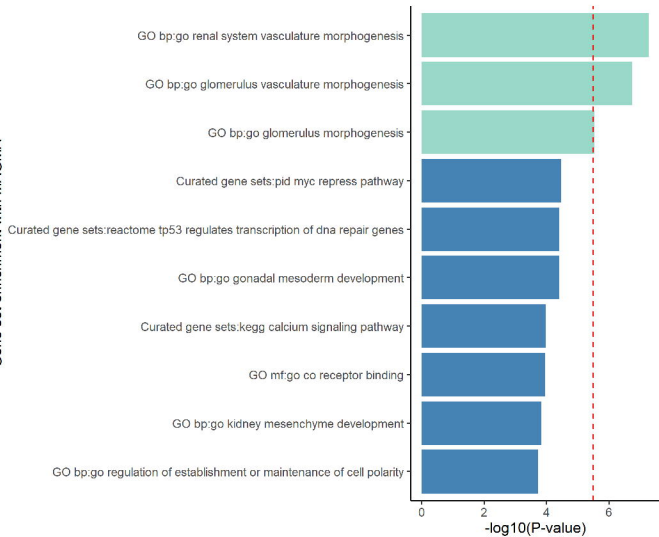

B

Tissue enrichment with MAGMA

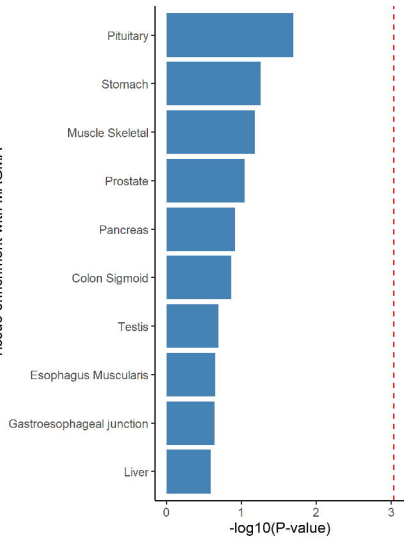

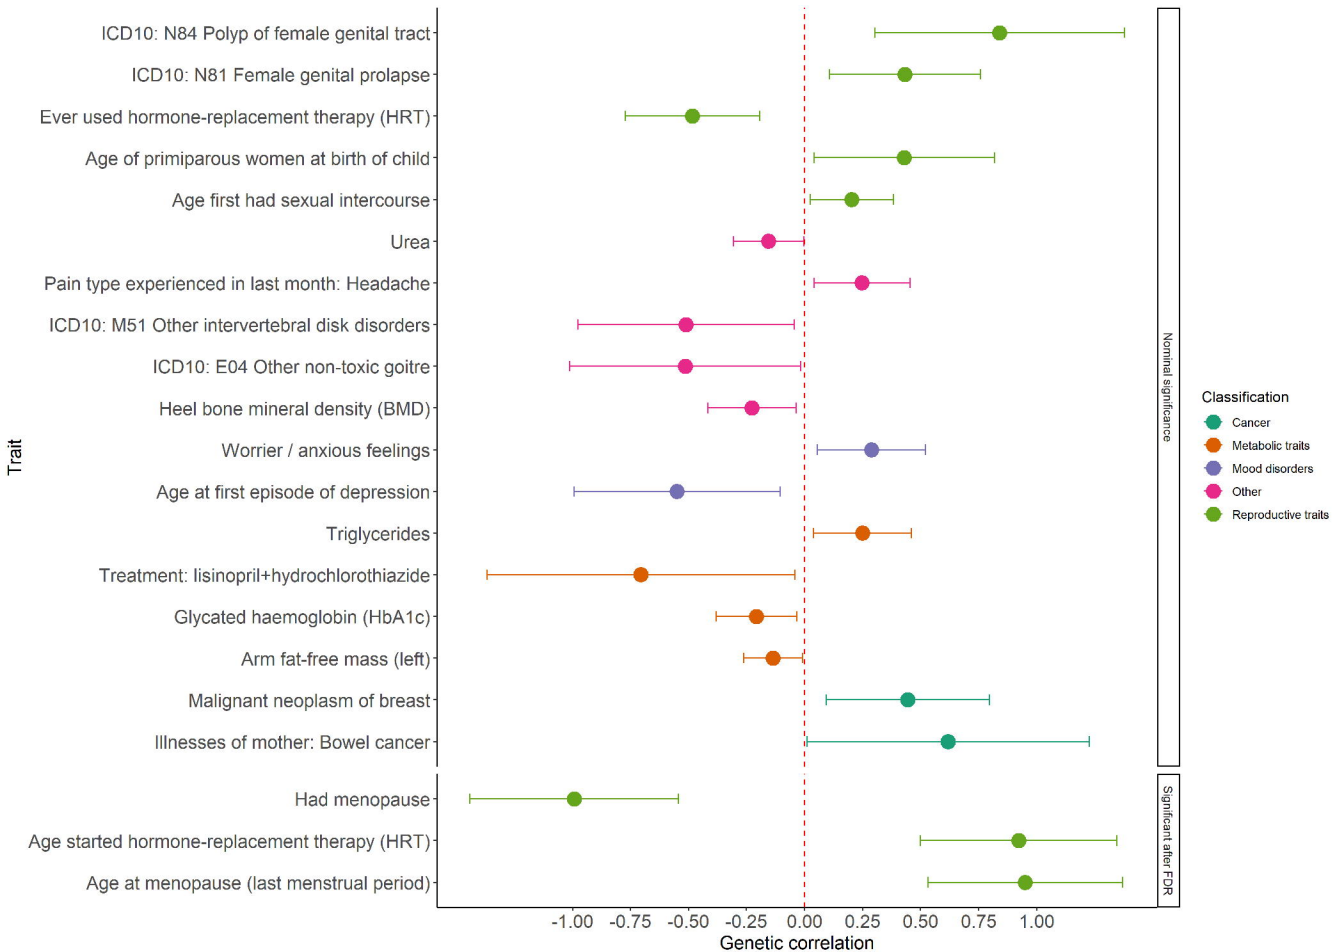

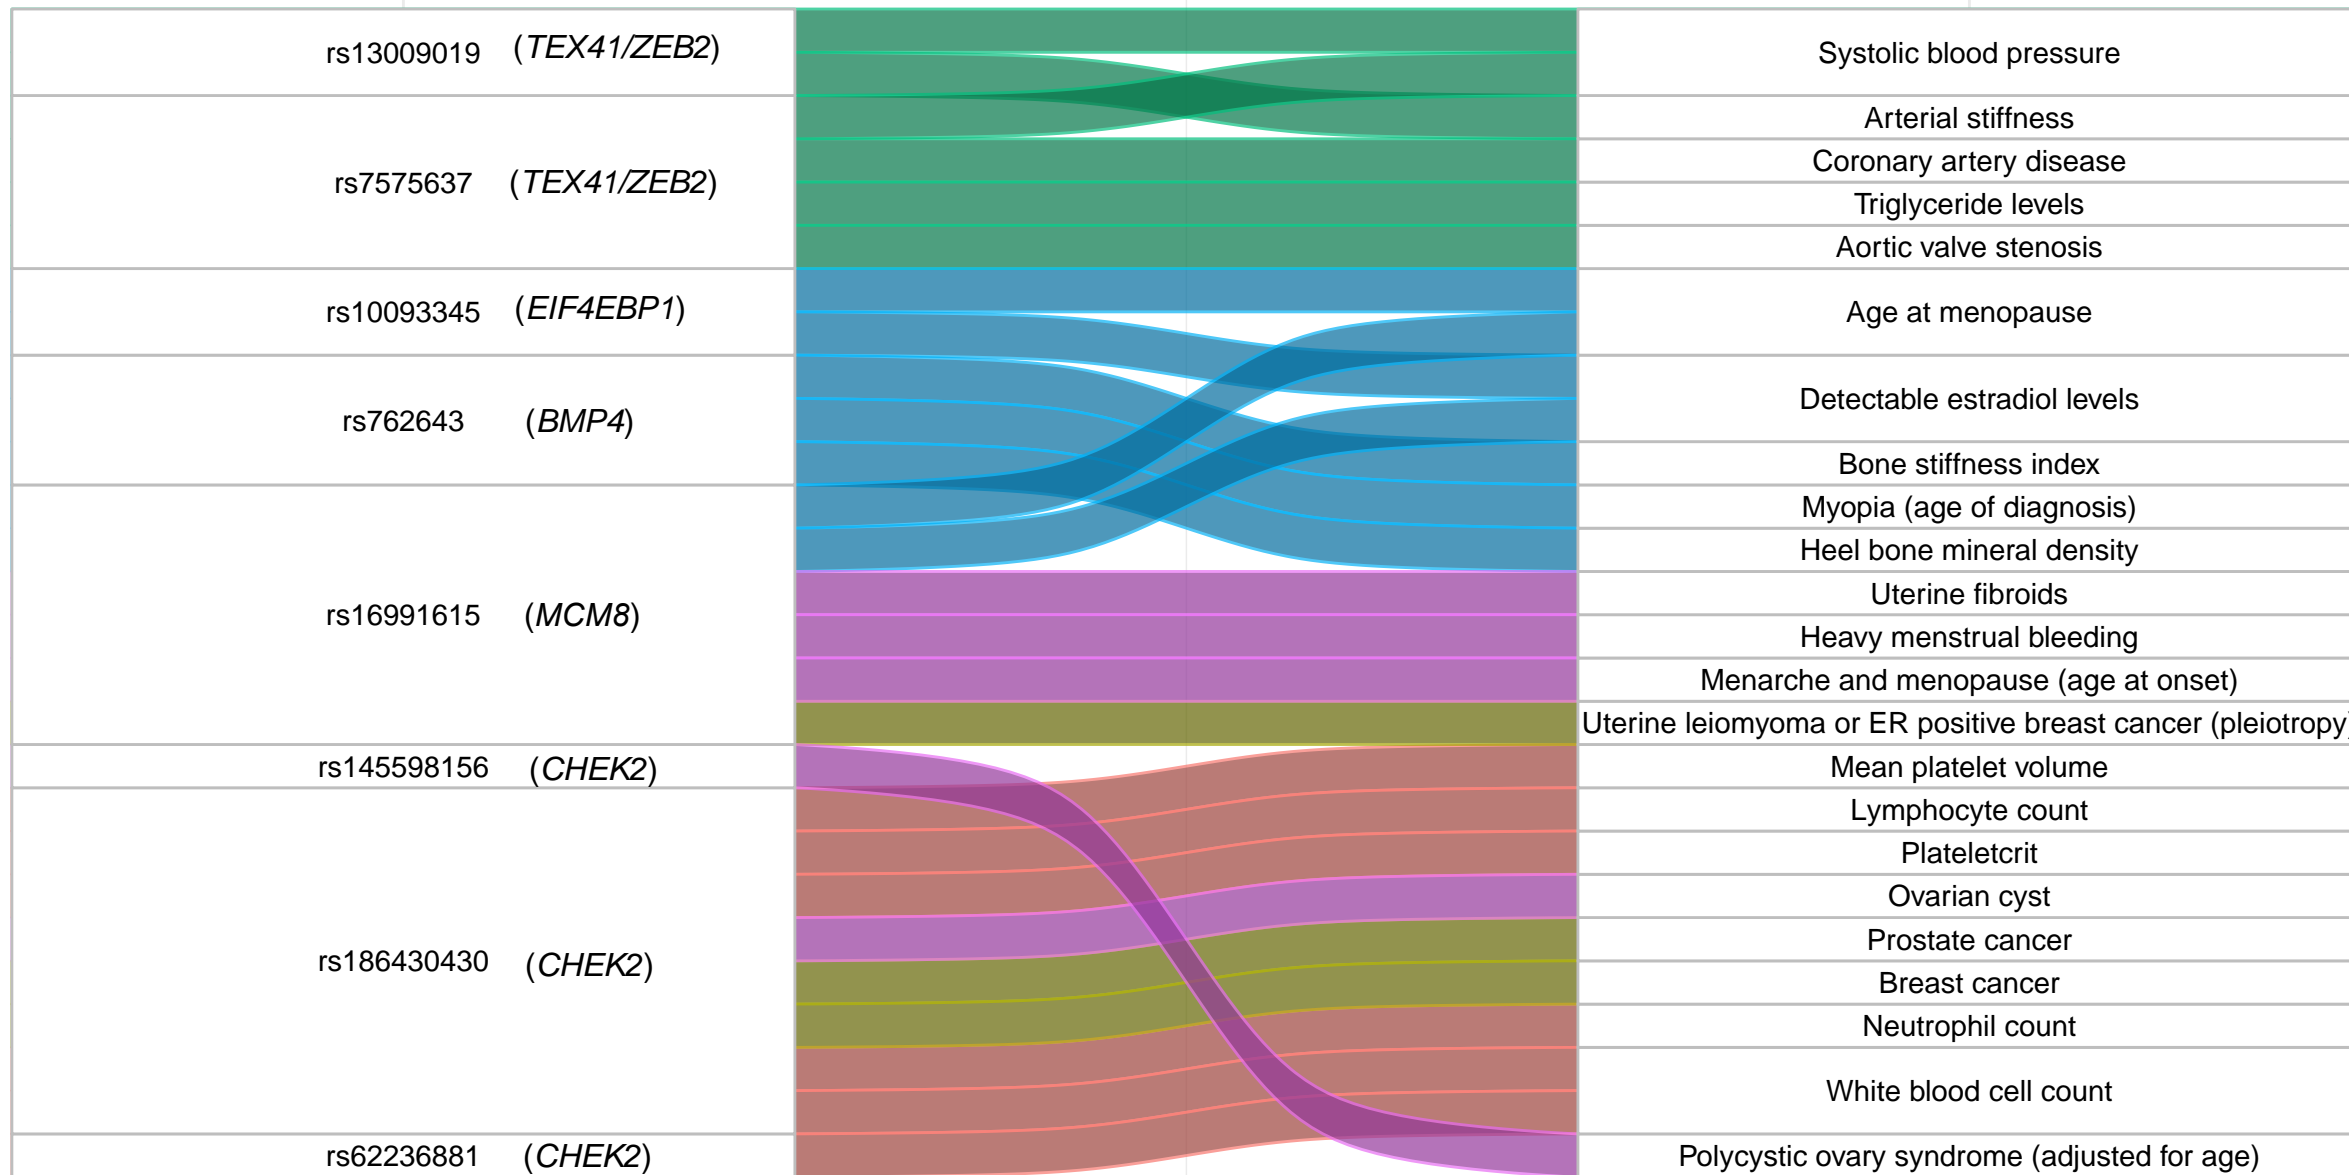

Category

- Blood cell counts
- Cancer
- Cardiovascular disease
- Menopause related trait
- Reproductive traits

SNP (potential candidate gene)

Traits
